# Supplementary material for: The Internet Addiction Test: Factor structure, measurement invariance, and psychometric properties of a six-item version among Spanish women with eating disorders
Source: Research Square preprint supplement (doi:10.21203/rs.3.rs-540804/v1), 2021-05-21
Supplement: Supplementary file 1 [file 748f42d59ebeb80904600f91.xlsx]

## Sheet: EFA Whole sample
KMO and Bartlett's Test
Kaiser-Meyer-Olkin Measure of Sampling Adequacy.		0.956264
Bartlett's Test of Sphericity	Approx. Chi-Square	4172.94
	df	190
	Sig.	0
Communalities
	Initial
Do you choose to spend mor e time online over going out with others?	0.881508
Do you snap, yell, or act annoyed if someone bothers you while you are online?	0.875916
Do you fear that life without the Internet would be boring, empty and joyless?	0.883104
Do you feel preoccupied with the Internet when off-line or fantasise about being online?	0.947426
Do you block disturbing thoughts about your life with soothing thoughts of the Internet?	0.908291
Do you neglect household chores to spend more time online?	0.788131
Do you lose sleep due to late night log-ins?	0.940645
Do you feel depressed, moody, or nervous when you are of fline, which goes away once you are back online?	0.872995
Do you find that you stay online longer than you intended?	0.795927
Do you try to hide how long you’ve been online?	0.928065
Does your work suffer (e.g., postponing things, not meeting deadlines, etc.) because of the amount of time you spend online?	0.910111
Does your job performance or productivity suffer because of the Internet?	0.919935
Do you become defensive or secretive when anyone asks you what you do online?	0.922631
Do you find yourself anticipating when you go online again?	0.923449
Do you check your E-mail before something else that you need to do?	0.898199
Do you try to cut down the amount of time you spend online and fail?	0.932112
Do others in your life complain to you about the amount of time you spend online?	0.906238
Do you find yourself saying “Just a few more minutes” when online?	0.939837
Do you form new relationships with fellow online users?	0.836363
Do you prefer excitement of the Internet to intimacy with your partner?	0.791233
Extraction Method: Maximum Likelihood.
Total Variance Explained
Factor	Initial Eigenvalues
	Total	% of Variance	Cumulative %
1	16.6768	83.3838	83.3838
2	0.575602	2.87801	86.2618
3	0.373729	1.86865	88.1305
4	0.313195	1.56598	89.6965
5	0.280885	1.40442	91.1009
6	0.261052	1.30526	92.4061
7	0.243332	1.21666	93.6228
8	0.186194	0.930968	94.5538
9	0.172751	0.863755	95.4175
10	0.15372	0.7686	96.1861
11	0.144193	0.720963	96.9071
12	0.119645	0.598224	97.5053
13	0.114013	0.570065	98.0754
14	0.095507	0.477535	98.5529
15	0.0828929	0.414464	98.9674
16	0.0609452	0.304726	99.2721
17	0.0495087	0.247544	99.5197
18	0.0358175	0.179087	99.6987
19	0.0341752	0.170876	99.8696
20	0.0260765	0.130382	100
Extraction Method: Maximum Likelihood.

## Sheet: EFA Anorexia
KMO and Bartlett's Test
Kaiser-Meyer-Olkin Measure of Sampling Adequacy.		0.909976
Bartlett's Test of Sphericity	Approx. Chi-Square	1562.84
	df	190
	Sig.	3.83461e-214
Communalities
	Initial
Do you choose to spend mor e time online over going out with others?	0.873177
Do you snap, yell, or act annoyed if someone bothers you while you are online?	0.864617
Do you fear that life without the Internet would be boring, empty and joyless?	0.860985
Do you feel preoccupied with the Internet when off-line or fantasise about being online?	0.901457
Do you block disturbing thoughts about your life with soothing thoughts of the Internet?	0.913712
Do you neglect household chores to spend more time online?	0.831236
Do you lose sleep due to late night log-ins?	0.909117
Do you feel depressed, moody, or nervous when you are of fline, which goes away once you are back online?	0.876583
Do you find that you stay online longer than you intended?	0.781336
Do you try to hide how long you’ve been online?	0.903432
Does your work suffer (e.g., postponing things, not meeting deadlines, etc.) because of the amount of time you spend online?	0.884912
Does your job performance or productivity suffer because of the Internet?	0.91979
Do you become defensive or secretive when anyone asks you what you do online?	0.948101
Do you find yourself anticipating when you go online again?	0.913903
Do you check your E-mail before something else that you need to do?	0.9202
Do you try to cut down the amount of time you spend online and fail?	0.939251
Do others in your life complain to you about the amount of time you spend online?	0.868662
Do you find yourself saying “Just a few more minutes” when online?	0.912823
Do you form new relationships with fellow online users?	0.827827
Do you prefer excitement of the Internet to intimacy with your partner?	0.669728
Extraction Method: Maximum Likelihood.
Total Variance Explained
Factor	Initial Eigenvalues
	Total	% of Variance	Cumulative %
1	14.8889	74.4443	74.4443
2	0.976024	4.88012	79.3244
3	0.680793	3.40397	82.7284
4	0.534377	2.67188	85.4003
5	0.438532	2.19266	87.5929
6	0.386004	1.93002	89.5229
7	0.328857	1.64428	91.1672
8	0.31906	1.5953	92.7625
9	0.26683	1.33415	94.0967
10	0.236422	1.18211	95.2788
11	0.193171	0.965853	96.2446
12	0.165521	0.827605	97.0722
13	0.14694	0.734698	97.8069
14	0.123448	0.617239	98.4242
15	0.0926549	0.463274	98.8874
16	0.0727651	0.363825	99.2513
17	0.0590075	0.295038	99.5463
18	0.0350703	0.175352	99.7217
19	0.0320465	0.160233	99.8819
20	0.0236224	0.118112	100
Extraction Method: Maximum Likelihood.
After removal of item 4 and item 7
KMO and Bartlett's Test
Kaiser-Meyer-Olkin Measure of Sampling Adequacy.		0.922076
Bartlett's Test of Sphericity	Approx. Chi-Square	1366.42
	df	153
	Sig.	1.02734e-193
Communalities
	Initial
Do you choose to spend mor e time online over going out with others?	0.87091
Do you snap, yell, or act annoyed if someone bothers you while you are online?	0.861788
Do you fear that life without the Internet would be boring, empty and joyless?	0.848072
Do you feel preoccupied with the Internet when off-line or fantasise about being online?	0.895128
Do you block disturbing thoughts about your life with soothing thoughts of the Internet?	0.912522
Do you neglect household chores to spend more time online?	0.758778
Do you lose sleep due to late night log-ins?	0.900585
Do you feel depressed, moody, or nervous when you are of fline, which goes away once you are back online?	0.836457
Do you find that you stay online longer than you intended?	0.719621
Do you try to hide how long you’ve been online?	0.880013
Does your work suffer (e.g., postponing things, not meeting deadlines, etc.) because of the amount of time you spend online?	0.801903
Does your job performance or productivity suffer because of the Internet?	0.904496
Do you become defensive or secretive when anyone asks you what you do online?	0.945665
Do you find yourself anticipating when you go online again?	0.905938
Do you try to cut down the amount of time you spend online and fail?	0.935204
Do others in your life complain to you about the amount of time you spend online?	0.838288
Do you find yourself saying “Just a few more minutes” when online?	0.897024
Do you prefer excitement of the Internet to intimacy with your partner?	0.648595
Extraction Method: Maximum Likelihood.
Total Variance Explained
Factor	Initial Eigenvalues
	Total	% of Variance	Cumulative %
1	13.5831	75.4615	75.4615
2	0.778953	4.32752	79.789
3	0.629527	3.49737	83.2864
4	0.444902	2.47168	85.758
5	0.412598	2.29221	88.0502
6	0.360783	2.00435	90.0546
7	0.325653	1.80918	91.8638
8	0.271354	1.50752	93.3713
9	0.248463	1.38035	94.7517
10	0.215775	1.19875	95.9504
11	0.173063	0.96146	96.9119
12	0.138217	0.767874	97.6797
13	0.128526	0.714032	98.3938
14	0.0906263	0.50348	98.8972
15	0.0726997	0.403887	99.3011
16	0.0635087	0.352826	99.654
17	0.036719	0.203994	99.858
18	0.0255681	0.142045	100
Extraction Method: Maximum Likelihood.

## Sheet: EFA Other EDs
KMO and Bartlett's Test
Kaiser-Meyer-Olkin Measure of Sampling Adequacy.		0.942112
Bartlett's Test of Sphericity	Approx. Chi-Square	2416.36
	df	190
	Sig.	0
Communalities
	Initial
Do you choose to spend mor e time online over going out with others?	0.926671
Do you snap, yell, or act annoyed if someone bothers you while you are online?	0.916739
Do you fear that life without the Internet would be boring, empty and joyless?	0.916907
Do you feel preoccupied with the Internet when off-line or fantasise about being online?	0.977029
Do you block disturbing thoughts about your life with soothing thoughts of the Internet?	0.929568
Do you neglect household chores to spend more time online?	0.863569
Do you lose sleep due to late night log-ins?	0.976587
Do you feel depressed, moody, or nervous when you are of fline, which goes away once you are back online?	0.950704
Do you find that you stay online longer than you intended?	0.856845
Do you try to hide how long you’ve been online?	0.957802
Does your work suffer (e.g., postponing things, not meeting deadlines, etc.) because of the amount of time you spend online?	0.940876
Does your job performance or productivity suffer because of the Internet?	0.944359
Do you become defensive or secretive when anyone asks you what you do online?	0.926911
Do you find yourself anticipating when you go online again?	0.944007
Do you check your E-mail before something else that you need to do?	0.936747
Do you try to cut down the amount of time you spend online and fail?	0.946449
Do others in your life complain to you about the amount of time you spend online?	0.935395
Do you find yourself saying “Just a few more minutes” when online?	0.975584
Do you form new relationships with fellow online users?	0.875427
Do you prefer excitement of the Internet to intimacy with your partner?	0.899982
Extraction Method: Maximum Likelihood.
Total Variance Explained
Factor	Initial Eigenvalues
	Total	% of Variance	Cumulative %
1	17.4802	87.4009	87.4009
2	0.495557	2.47778	89.8787
3	0.291393	1.45697	91.3356
4	0.28571	1.42855	92.7642
5	0.208499	1.0425	93.8067
6	0.195125	0.975626	94.7823
7	0.168242	0.84121	95.6235
8	0.150785	0.753927	96.3774
9	0.133737	0.668685	97.0461
10	0.108433	0.542167	97.5883
11	0.0925864	0.462932	98.0512
12	0.0771636	0.385818	98.437
13	0.0645689	0.322844	98.7599
14	0.0567002	0.283501	99.0434
15	0.0520672	0.260336	99.3037
16	0.0432408	0.216204	99.5199
17	0.0399464	0.199732	99.7197
18	0.0257487	0.128743	99.8484
19	0.0215581	0.10779	99.9562
20	0.00876287	0.0438143	100
Extraction Method: Maximum Likelihood.

## Sheet: Subgroup analysis
Multigroup analysis of 1F 20 items with correlated errors
Assuming model Unconstrained to be correct:
Model	DF	CMIN	P	NFI	IFI	RFI	TLI
				Delta-1	Delta-2	rho-1	rho2
Measurement weights	19	15.27	0.705	0.003	0.004	-0.007	-0.007
Structural covariances	20	25.195	0.194	0.006	0.006	-0.005	-0.005
Measurement residuals	44	52.113	0.188	0.011	0.012	-0.011	-0.012
a1	1	0.573	0.449	0	0	0	0
a10 item 14	1	4.013	0.045	0.001	0.001	0	0
a11 item 15	1	6.72	0.01	0.001	0.002	0.001	0.001
a12 item 16	1	5.069	0.024	0.001	0.001	0.001	0.001
a13 item 17	1	3.594	0.058	0.001	0.001	0	0
a14	1	2.754	0.097	0.001	0.001	0	0
a15	1	0.177	0.674	0	0	-0.001	-0.001
a16	1	3.024	0.082	0.001	0.001	0	0
a17	1	0.011	0.918	0	0	-0.001	-0.001
a18	1	0.391	0.532	0	0	0	-0.001
a19	1	0.933	0.334	0	0	0	0
a2	1	2.427	0.119	0.001	0.001	0	0
a3	1	0.754	0.385	0	0	0	0
a4	1	0.575	0.448	0	0	0	0
a6	1	1.12	0.29	0	0	0	0
a7	1	0.227	0.634	0	0	-0.001	-0.001
a8	1	2.523	0.112	0.001	0.001	0	0
a9	1	2.881	0.09	0.001	0.001	0	0
a5	1	0.777	0.378	0	0	0	0
Multigroup analysis of 1F 19 items with correlated errors
Assuming model Unconstrained to be correct:
Model	DF	CMIN	P	NFI	IFI	RFI	TLI
				Delta-1	Delta-2	rho-1	rho2
Measurement weights	18	16.719	0.543	0.004	0.004	-0.006	-0.007
Structural covariances	19	27.28	0.098	0.006	0.007	-0.004	-0.005
Measurement residuals	40	50.022	0.133	0.012	0.013	-0.01	-0.011
a1	1	0.568	0.451	0	0	0	-0.001
a10---14	1	3.74	0.053	0.001	0.001	0	0
a11---item 15	1	6.239	0.012	0.001	0.002	0.001	0.001
a12---item 16	1	5.007	0.025	0.001	0.001	0.001	0.001
a13---17	1	3.348	0.067	0.001	0.001	0	0
a14	1	2.535	0.111	0.001	0.001	0	0
a15	1	0.177	0.674	0	0	-0.001	-0.001
a16	1	3.316	0.069	0.001	0.001	0	0
a17	1	0.044	0.835	0	0	-0.001	-0.001
a18	1	0.421	0.517	0	0	-0.001	-0.001
a2	1	2.393	0.122	0.001	0.001	0	0
a3	1	0.716	0.398	0	0	0	0
a4	1	0.48	0.489	0	0	0	-0.001
a5	1	0.889	0.346	0	0	0	0
a6	1	0.977	0.323	0	0	0	0
a7	1	0.229	0.633	0	0	-0.001	-0.001
a8	1	2.384	0.123	0.001	0.001	0	0
a9	1	3.067	0.08	0.001	0.001	0	0
Multigroup analysis of 2F 20 items with correlated errors
Assuming model Unconstrained to be correct:
Model	DF	CMIN	P	NFI	IFI	RFI	TLI
				Delta-1	Delta-2	rho-1	rho2
Measurement weights	18	11.095	0.89	0.002	0.003	-0.007	-0.007
Structural covariances	21	23.944	0.296	0.005	0.006	-0.005	-0.006
Measurement residuals	46	51.262	0.275	0.011	0.012	-0.011	-0.012
a2	1	2.546	0.111	0.001	0.001	0	0
a3	1	0.827	0.363	0	0	0	0
a4	1	0.612	0.434	0	0	0	0
a5	1	0.265	0.607	0	0	0	-0.001
a6---item 14	1	4.216	0.04	0.001	0.001	0.001	0.001
a7---item 15	1	6.614	0.01	0.001	0.002	0.001	0.001
a8	1	0.027	0.87	0	0	-0.001	-0.001
a9	1	0.075	0.784	0	0	-0.001	-0.001
a14---item 16	1	0.719	0.396	0	0	0	0
Multigroup analysis of (Model 8) 2F 19 items with correlated errors
Assuming model Unconstrained to be correct:
Model	DF	CMIN	P	NFI	IFI	RFI	TLI
				Delta-1	Delta-2	rho-1	rho2
Measurement weights	17	10.039	0.902	0.002	0.003	-0.006	-0.007
Structural covariances	20	23.526	0.264	0.006	0.006	-0.004	-0.005
Measurement residuals	44	47.857	0.319	0.011	0.012	-0.01	-0.011
a4	1	0.584	0.445	0	0	0	0
a6----item 14	1	4.088	0.043	0.001	0.001	0.001	0.001
a7----item 15	1	6.348	0.012	0.002	0.002	0.001	0.001
a13----item 16	1	0.523	0.47	0	0	0	0
Multigroup analysis of (Model 11) 2F 19 items with correlated errors
Assuming model Unconstrained to be correct:
Model	DF	CMIN	P	NFI	IFI	RFI	TLI
				Delta-1	Delta-2	rho-1	rho2
Measurement weights	17	13.329	0.714	0.003	0.003	-0.006	-0.006
Structural covariances	20	27.187	0.13	0.006	0.007	-0.004	-0.004
Measurement residuals	44	51.274	0.21	0.012	0.013	-0.009	-0.01
a14---item 15	1	2.47	0.116	0.001	0.001	0	0
a3---item 14	1	0.607	0.436	0	0	0	0
a4---item 16	1	0.659	0.417	0	0	0	0
a13---item 13	1	0.014	0.906	0	0	-0.001	-0.001
a10	1	0.007	0.933	0	0	-0.001	-0.001
a11	1	0.548	0.459	0	0	0	0
a12	1	0.049	0.825	0	0	-0.001	-0.001
a15	1	0.807	0.369	0	0	0	0
a16	1	0.018	0.892	0	0	-0.001	-0.001
a17	1	0.135	0.713	0	0	-0.001	-0.001
a2	1	0.274	0.601	0	0	0	-0.001
a5	1	0.426	0.514	0	0	0	0
a7	1	0.019	0.891	0	0	-0.001	-0.001
a8	1	0.545	0.46	0	0	0	0
a9	1	0.255	0.614	0	0	0	-0.001
Assuming model Unconstrained to be correct:
Model	DF	CMIN	P	NFI	IFI	RFI	TLI
				Delta-1	Delta-2	rho-1	rho2
Measurement weights	17	13.329	0.714	0.003	0.003	-0.006	-0.006
Structural covariances	20	27.187	0.13	0.006	0.007	-0.004	-0.004
Measurement residuals	44	51.274	0.21	0.012	0.013	-0.009	-0.01
ccc1	1	6.022	0.014	0.001	0.002	0.001	0.001
c1	1	0.047	0.829	0	0	-0.001	-0.001
c2	1	0.536	0.464	0	0	0	0
c3	1	2.404	0.121	0.001	0.001	0	0
c4	1	0.106	0.745	0	0	-0.001	-0.001
c5	1	0.09	0.764	0	0	-0.001	-0.001
Critical Ratios for Differences between Parameters (Unconstrained)
	a1_1	a2_1	a3_1	a4_1	a5_1	a6_1	a7_1	a8_1	a9_1	a10_1	a11_1	a12_1	a13_1	a14_1	a15_1	a16_1	a17_1	ccc1_1	c1_1	c2_1	c3_1	c4_1	c5_1	v1_1	v2_1	v3_1	v4_1	v5_1	v6_1	v7_1	vvv1_1	v8_1	v9_1	v10_1	v11_1	v12_1	v13_1	v14_1	v15_1	v16_1	v17_1	v18_1	v19_1	vvv2_1	a1_2	a2_2	a3_2	a4_2	a5_2
a1_1	0
a2_1	1.199	0
a3_1	1.016	-0.187	0
a4_1	0.94	-0.407	-0.19	0
a5_1	0.804	-0.537	-0.322	-0.156	0
a6_1	1.526	0.415	0.585	0.847	0.96	0
a7_1	-0.729	-1.68	-1.545	-1.511	-1.41	-1.905	0
a8_1	-0.355	-1.313	-1.178	-1.122	-1.022	-1.55	0.754	0
a9_1	0.172	-0.735	-0.609	-0.521	-0.429	-1.077	1.713	1.168	0
a10_1	-0.294	-1.239	-1.106	-1.046	-0.947	-1.476	0.837	0.126	-1.004	0
a11_1	-0.555	-1.537	-1.398	-1.356	-1.252	-1.772	0.395	-0.457	-1.632	-0.566	0
a12_1	-0.164	-1.084	-0.956	-0.887	-0.792	-1.321	1.024	0.382	-0.691	0.255	0.798	0
a13_1	-0.291	-1.237	-1.104	-1.044	-0.945	-1.475	0.85	0.135	-1.005	0.008	0.58	-0.25	0
a14_1	-1.049	-2.05	-2.123	-2.032	-1.789	-2.272	-0.533	-1.442	-2.431	-1.503	-1.076	-1.659	-1.523	0
a15_1	-0.574	-1.529	-1.394	-1.35	-1.371	-1.759	0.296	-0.467	-1.506	-0.565	-0.072	-0.777	-0.577	0.887	0
a16_1	0.103	-0.8	-0.674	-0.591	-0.499	-1.041	1.531	0.968	-0.144	0.819	1.404	0.53	0.818	2.205	1.651	0
a17_1	0.502	-0.374	-0.253	-0.148	-0.061	-0.62	2.301	1.877	0.734	1.696	2.333	1.359	1.703	3.02	2.14	0.843	0
ccc1_1	-1.396	-2.108	-2.01	-1.989	-1.916	-2.271	-0.918	-1.261	-1.659	-1.298	-1.114	-1.382	-1.302	-0.693	-1.063	-1.594	-1.905	0
c1_1	-5.145	-6.508	-6.294	-6.708	-6.497	-6.593	-5.535	-6.406	-6.633	-6.309	-6.388	-6.188	-6.342	-5.628	-5.866	-6.443	-6.779	-3.145	0
c2_1	-4.862	-6.191	-5.983	-6.355	-6.181	-6.241	-5.137	-5.964	-6.186	-5.887	-5.92	-5.795	-5.916	-5.172	-5.487	-6.057	-6.406	-2.877	0.559	0
c3_1	-4.947	-6.29	-6.065	-6.477	-6.289	-6.381	-5.26	-6.105	-6.359	-6.021	-6.07	-5.919	-6.051	-5.29	-5.616	-6.179	-6.524	-2.951	0.44	-0.133	0
c4_1	-5.466	-6.864	-6.656	-7.092	-6.913	-6.931	-5.988	-6.905	-7.076	-6.788	-6.919	-6.633	-6.823	-6.123	-6.374	-6.879	-7.197	-3.454	-0.804	-1.325	-1.274	0
c5_1	-5.217	-6.575	-6.363	-6.777	-6.592	-6.662	-5.616	-6.48	-6.706	-6.384	-6.463	-6.263	-6.416	-5.713	-5.928	-6.469	-6.848	-3.231	-0.272	-0.786	-0.678	0.47	0
v1_1	-4.025	-5.315	-5.118	-5.404	-5.24	-5.449	-3.974	-4.719	-5.098	-4.682	-4.615	-4.655	-4.705	-3.889	-4.29	-4.938	-5.325	-1.988	2.325	1.714	1.888	3.1	2.488	0
v2_1	-2.401	-3.5	-3.344	-3.431	-3.309	-3.685	-2.004	-2.557	-3.056	-2.582	-2.381	-2.653	-2.593	-1.755	-2.237	-2.943	-3.358	-0.6	3.547	3.122	3.249	4.043	3.657	1.858	0
v3_1	-2.315	-3.363	-3.21	-3.285	-3.166	-3.552	-1.888	-2.442	-2.952	-2.469	-2.26	-2.545	-2.48	-1.629	-2.12	-2.839	-3.262	-0.492	3.6	3.189	3.311	4.077	3.703	1.959	0.124	0
v4_1	-3.181	-4.34	-4.166	-4.335	-4.196	-4.504	-2.886	-3.565	-4.02	-3.565	-3.414	-3.596	-3.581	-2.736	-3.195	-3.887	-4.295	-1.267	3.061	2.553	2.702	3.668	3.186	1.085	-0.842	-0.959	0
v5_1	-4.527	-5.846	-5.642	-5.986	-5.816	-5.959	-4.711	-5.456	-5.834	-5.459	-5.462	-5.385	-5.486	-4.709	-5.056	-5.657	-6.023	-2.524	1.487	0.842	1.012	2.353	1.686	-0.982	-2.625	-2.704	-1.959	0
v6_1	-4.13	-5.33	-5.21	-5.498	-5.336	-5.532	-4.169	-4.927	-5.291	-4.883	-4.832	-4.846	-4.907	-4.106	-4.492	-5.126	-5.507	-2.15	2.056	1.448	1.618	2.835	2.23	-0.27	-2.065	-2.162	-1.323	0.7	0
v7_1	-3.985	-5.239	-5.05	-5.318	-5.16	-5.3	-3.973	-4.71	-5.047	-4.675	-4.605	-4.65	-4.697	-3.888	-4.287	-4.931	-5.318	-2.015	2.22	3.062	1.799	2.964	2.386	-0.041	-1.87	-1.97	-1.106	0.915	0.223	0
vvv1_1	-1.957	-2.625	-2.533	-2.532	-2.463	-2.767	-1.959	-2.425	-2.88	-2.453	-2.262	-2.529	-2.462	-1.728	-2.155	-2.787	-3.163	-1.843	2.416	2.128	2.207	2.754	2.512	1.165	-0.248	-0.349	0.421	1.735	1.338	1.197	0
v8_1	-4.189	-5.467	-5.271	-5.567	-5.405	-5.552	-4.247	-5.012	-5.296	-4.966	-4.922	-4.924	-4.99	-4.187	-4.571	-5.202	-5.582	-2.206	1.961	2.597	1.52	2.744	2.132	-0.375	-2.149	-2.24	-1.415	0.592	-0.104	-0.412	-1.399	0
v9_1	-4.207	-5.489	-5.292	-5.592	-5.429	-5.615	-4.273	-5.043	-5.395	-4.93	-4.954	-4.951	-5.02	-4.217	-4.599	-5.229	-5.608	-2.219	1.973	1.353	1.524	2.771	2.145	-0.394	-2.171	-2.261	-1.438	0.584	-0.12	-0.344	-1.411	-0.015	0
v10_1	-4.798	-6.147	-5.937	-6.319	-6.142	-6.247	-5.085	-5.937	-6.207	-5.854	-5.828	-5.755	-5.885	-5.133	-5.446	-6.021	-6.374	-2.783	0.996	0.34	0.503	1.915	1.226	-1.536	-3.023	-3.089	-2.428	-0.573	-1.25	-1.451	-2.014	-1.141	-1.141	0
v11_1	-3.658	-4.874	-4.69	-4.916	-4.766	-5.022	-3.54	-4.237	-4.651	-4.217	-4.111	-4.159	-4.237	-3.405	-3.834	-4.503	-4.9	-1.707	2.606	2.048	2.208	3.29	2.748	0.456	-1.438	-1.545	-0.631	1.384	0.711	0.487	-0.876	0.808	0.829	1.894	0
v12_1	-4.277	-5.567	-5.369	-5.678	-5.513	-5.69	-4.368	-5.148	-5.491	-5.096	-5.064	-5.045	-5.055	-4.323	-4.698	-5.322	-5.699	-2.286	1.874	1.248	1.419	2.687	2.051	-0.517	-2.268	-2.357	-1.549	0.464	-0.241	-0.463	-1.482	-0.135	-0.121	1.026	-0.946	0
v13_1	-3.829	-5.065	-4.808	-5.126	-4.973	-5.207	-3.765	-4.484	-4.882	-4.456	-4.368	-4.443	-4.477	-3.623	-4.071	-4.727	-5.118	-1.867	2.419	1.843	3.345	3.128	2.577	0.206	-1.66	-1.765	-0.873	1.154	0.466	0.242	-1.042	0.568	0.588	1.679	-0.247	0.706	0
v14_1	-4.096	-5.375	-5.173	-5.467	-5.307	-5.504	-4.133	-4.9	-5.26	-4.855	-4.805	-4.816	-4.879	-4.027	-4.455	-5.098	-5.482	-2.1	2.278	1.633	2.937	4.054	2.439	-0.155	-2.007	-2.103	-1.244	0.859	0.125	-0.109	-1.28	0.233	0.251	1.439	-0.613	0.377	-0.421	0
v15_1	-4.774	-6.119	-5.911	-6.21	-6.113	-6.221	-5.05	-5.897	-6.174	-5.816	-5.854	-5.72	-5.846	-5.065	-5.413	-5.986	-6.34	-2.764	1.02	0.372	0.532	2.84	1.252	-1.487	-2.987	-3.058	-2.39	-0.53	-1.202	-1.402	-1.993	-1.1	-1.098	0.04	-1.854	-0.982	-1.632	-1.497	0
v16_1	-4.539	-5.859	-5.657	-6.002	-5.756	-5.971	-4.726	-5.542	-5.852	-5.475	-5.479	-5.401	-5.503	-4.733	-5.035	-5.672	-6.037	-2.536	2.518	0.818	0.989	2.331	1.668	-1.005	-2.641	-2.722	-1.982	-0.025	-0.723	-0.937	-1.748	-0.618	-0.61	0.548	-1.408	-0.49	-1.174	-0.886	0.503	0
v17_1	-3.786	-5.027	-4.839	-5.087	-4.915	-5.17	-3.717	-4.44	-4.84	-4.412	-4.323	-4.399	-4.433	-3.602	-3.974	-4.672	-5.08	-1.814	3.881	2.007	2.178	3.354	3.703	0.325	-1.592	-1.697	-0.786	1.302	0.592	0.359	-0.98	0.695	0.716	1.848	-0.143	0.839	0.11	0.486	1.804	1.524	0
v18_1	-3.814	-5.048	-4.86	-5.106	-4.953	-5.19	-3.745	-4.461	-4.859	-4.434	-4.344	-4.422	-4.455	-3.63	-4.022	-4.642	-5.098	-1.855	2.423	1.85	2.013	3.131	3.777	0.222	-1.643	-1.746	-0.854	1.162	0.482	0.258	-1.029	0.581	0.601	1.683	-0.229	0.719	0.017	0.376	1.642	1.187	-0.101	0
v19_1	-4.007	-5.261	-5.07	-5.339	-5.182	-5.396	-3.999	-4.738	-5.115	-4.701	-4.634	-4.675	-4.724	-3.911	-4.312	-4.957	-5.269	-2.037	2.167	1.581	1.746	2.902	2.326	-0.085	-1.902	-1.998	-1.14	0.863	0.179	-0.043	-1.222	0.28	0.297	1.393	-0.526	0.416	-0.284	0.063	1.353	0.889	-0.401	-0.298	0
vvv2_1	-0.448	-1.087	-0.999	-0.942	-0.879	-1.257	0.048	-0.184	-0.489	-0.217	-0.071	-0.29	-0.219	0.227	-0.05	-0.448	-0.681	1.579	2.93	2.767	2.811	3.118	2.989	2.205	1.261	1.173	1.725	2.535	2.3	2.215	1.68	2.337	2.344	2.695	2.017	2.386	2.12	2.266	2.683	2.542	2.084	2.112	2.23	0
a1_2	0.129	-0.885	-0.743	-0.658	-0.552	-1.149	1.127	0.641	-0.072	0.553	0.927	0.37	0.55	1.607	0.927	0.017	-0.5	2.108	8.786	8.128	8.354	9.53	8.829	6.483	3.568	3.366	4.886	7.617	6.756	6.446	3.206	6.872	6.925	8.218	5.793	7.074	6.133	6.762	8.151	7.64	6.105	6.098	6.476	0.595	0
a2_2	1.486	0.538	0.667	0.845	0.938	0.238	2.736	2.311	1.52	2.194	2.637	1.961	2.195	3.305	2.564	1.592	1.044	3.464	10.609	9.953	10.184	11.336	10.635	8.339	5.244	5.021	6.668	9.481	8.609	8.29	4.636	8.726	8.784	10.079	7.617	8.935	7.97	8.634	10.011	9.504	7.957	7.932	8.318	1.565	2.948	0
a3_2	1.64	0.686	0.816	1.007	1.1	0.379	2.947	2.523	1.704	2.399	2.863	2.154	2.401	3.545	2.776	1.776	1.214	3.647	11.233	10.524	10.777	12.021	11.248	8.819	5.532	5.297	7.035	10.042	9.104	8.761	4.853	9.228	9.292	10.687	8.044	9.454	8.42	9.141	10.611	10.066	8.413	8.379	8.79	1.672	3.477	0.351	0
a4_2	1.493	0.536	0.667	0.848	0.941	0.234	2.765	2.337	1.532	2.216	2.669	1.979	2.218	3.348	2.592	1.604	1.049	3.492	10.915	10.221	10.467	11.686	10.934	8.541	5.323	5.093	6.795	9.739	8.822	8.486	4.682	8.943	9.006	10.371	7.784	9.164	8.152	8.854	10.297	9.764	8.142	8.112	8.515	1.568	3.068	-0.016	-0.392	0
a5_2	1.245	0.289	0.42	0.582	0.676	-0.003	2.443	2.011	1.238	1.899	2.327	1.677	1.9	2.993	2.268	1.312	0.772	3.215	10.171	9.53	9.754	10.884	10.203	7.938	4.921	4.704	6.308	9.056	8.204	7.893	4.366	8.318	8.374	9.642	7.235	8.522	7.58	8.224	9.575	9.079	7.563	7.543	7.921	1.392	2.365	-0.547	-0.929	-0.559	0
a6_2	1.373	0.415	0.546	0.718	0.812	0.117	2.615	2.183	1.39	2.066	2.509	1.835	2.068	3.184	2.44	1.464	0.915	3.363	10.622	9.946	10.184	11.375	10.646	8.293	5.145	4.92	6.587	9.465	8.569	8.242	4.539	8.688	8.748	10.082	7.554	8.904	7.915	8.596	10.01	9.489	7.902	7.876	8.27	1.483	2.739	-0.293	-0.681	-0.294	0.275
a7_2	-0.71	-1.791	-1.636	-1.618	-1.499	-2.035	0.138	-0.407	-1.084	-0.477	-0.142	-0.63	-0.484	0.572	-0.087	-0.98	-1.486	1.31	8.233	7.476	7.736	9.105	8.274	5.645	2.622	2.425	3.954	6.904	5.945	5.607	2.392	6.073	6.132	7.59	4.905	6.297	5.269	5.95	7.512	6.931	5.234	5.232	5.641	0.016	-1.258	-3.237	-3.528	-3.296	-2.874
a8_2	0.192	-0.877	-0.727	-0.638	-0.525	-1.154	1.289	0.77	-0.011	0.669	1.089	0.466	0.667	1.837	1.077	0.085	-0.47	2.285	10.882	9.902	10.255	12.012	10.861	7.743	4.015	3.775	5.633	9.316	8.096	7.666	3.485	8.252	8.337	10.194	6.798	8.545	7.249	8.154	10.085	9.349	7.244	7.199	7.701	0.649	0.085	-2.036	-2.309	-2.073	-1.66
a9_2	-0.208	-1.291	-1.137	-1.081	-0.965	-1.555	0.787	0.25	-0.492	0.162	0.549	-0.02	0.158	1.291	0.566	-0.391	-0.929	1.869	9.99	9.061	9.391	11.067	9.988	6.969	3.444	3.218	4.974	8.468	7.31	6.904	3.029	7.459	7.537	9.303	6.079	7.735	6.507	7.352	9.201	8.499	6.491	6.461	6.939	0.372	-0.524	-2.611	-2.9	-2.661	-2.235
a10_2	-0.271	-1.363	-1.208	-1.157	-1.04	-1.625	0.715	0.171	-0.571	0.084	0.47	-0.096	0.08	1.219	0.492	-0.468	-1.007	1.816	10.108	9.138	9.484	11.236	10.098	6.986	3.393	3.165	4.943	8.535	7.336	6.918	2.98	7.49	7.571	9.404	6.071	7.775	6.51	7.382	9.297	8.567	6.496	6.462	6.953	0.33	-0.626	-2.731	-3.028	-2.785	-2.351
a11_2	-0.039	-1.113	-0.961	-0.891	-0.776	-1.381	0.994	0.467	-0.287	0.374	0.772	0.184	0.371	1.513	0.778	-0.189	-0.732	2.038	10.219	9.295	9.624	11.284	10.214	7.215	3.662	3.433	5.209	8.71	7.555	7.148	3.209	7.703	7.782	9.54	6.321	7.979	6.75	7.599	9.439	8.741	6.737	6.703	7.182	0.489	-0.265	-2.353	-2.632	-2.396	-1.979
a12_2	-0.005	-1.073	-0.922	-0.849	-0.736	-1.342	1.032	0.508	-0.245	0.416	0.814	0.225	0.412	1.55	0.817	-0.148	-0.69	2.066	10.144	9.243	9.563	11.182	10.144	7.197	3.686	3.459	5.22	8.664	7.532	7.132	3.234	7.678	7.755	9.475	6.318	7.948	6.741	7.573	9.376	8.694	6.727	6.695	7.167	0.512	-0.211	-2.288	-2.563	-2.329	-1.917
a13_2	-0.237	-1.319	-1.165	-1.111	-0.995	-1.581	0.747	0.21	-0.526	0.124	0.507	-0.056	0.119	1.246	0.527	-0.425	-0.961	1.834	9.835	8.925	9.247	10.887	9.837	6.863	3.388	3.165	4.899	8.335	7.2	6.801	2.988	7.347	7.422	9.153	5.989	7.616	6.41	7.237	9.054	8.366	6.393	6.365	6.836	0.351	-0.567	-2.643	-2.931	-2.693	-2.268
a14_2	0.105	-0.973	-0.821	-0.74	-0.625	-1.248	1.187	0.661	-0.117	0.562	0.979	0.362	0.559	1.732	0.972	-0.02	-0.574	2.205	10.917	9.906	10.27	12.088	10.89	7.699	3.925	3.685	5.556	9.31	8.059	7.62	3.405	8.218	8.305	10.215	6.736	8.518	7.195	8.12	10.102	9.343	7.19	7.144	7.655	0.59	-0.049	-2.183	-2.623	-2.408	-1.803
a15_2	0.091	-0.98	-0.829	-0.749	-0.635	-1.253	1.16	0.637	-0.132	0.54	0.95	0.343	0.537	1.695	0.946	-0.035	-0.585	2.177	10.587	9.633	9.975	11.688	10.574	7.51	3.86	3.625	5.446	9.047	7.856	7.437	3.364	8.009	8.091	9.904	6.587	8.294	7.029	7.908	9.798	9.079	7.02	6.98	7.471	0.579	-0.068	-2.175	-2.451	-2.214	-1.993
a16_2	0.004	-1.043	-0.895	-0.821	-0.71	-1.309	1.012	0.503	-0.229	0.413	0.797	0.228	0.41	1.508	0.803	-0.135	-0.664	2.033	9.387	8.614	8.884	10.269	9.413	6.77	3.563	3.349	4.988	8.065	7.074	6.72	3.165	7.205	7.269	8.766	5.988	7.44	6.37	7.096	8.684	8.092	6.347	6.329	6.753	0.512	-0.191	-2.19	-2.449	-2.225	-1.833
a17_2	0.271	-0.769	-0.623	-0.528	-0.419	-1.043	1.345	0.846	0.089	0.749	1.154	0.55	0.746	1.87	1.141	0.18	-0.361	2.313	9.99	9.182	9.467	10.908	10.004	7.289	3.946	3.722	5.43	8.635	7.601	7.232	3.474	7.737	7.805	9.365	6.471	7.983	6.868	7.633	9.278	8.662	6.851	6.825	7.265	0.7	0.204	-1.821	-2.073	-1.849	-1.463
ccc1_2	1.203	0.633	0.709	0.8	0.854	0.457	1.771	1.526	1.148	1.48	1.666	1.381	1.478	1.995	1.669	1.192	0.903	2.349	4.498	4.344	4.387	4.672	4.549	3.828	2.91	2.834	3.365	4.137	3.915	3.834	2.91	3.949	3.957	4.287	3.646	3.997	3.744	3.888	4.275	4.144	3.714	3.736	3.848	1.4	1.165	0.317	0.235	0.322	0.464
c1_2	-5.064	-6.422	-6.21	-6.615	-6.436	-6.511	-5.428	-6.292	-6.531	-6.2	-6.269	-6.085	-6.231	-5.51	-5.795	-6.342	-6.682	-3.062	0.219	-0.359	-0.23	1.042	0.477	-2.144	-3.427	-3.483	-2.916	-1.281	-1.873	-2.046	-2.324	-1.777	-1.785	-0.773	-2.444	-1.682	-2.251	-2.083	-0.801	-1.257	-2.432	-2.254	-1.993	-2.876	-8.641	-10.471	-11.09	-10.773	-9.968
c2_2	-5.205	-6.567	-6.354	-6.771	-6.59	-6.651	-5.607	-6.477	-6.701	-6.38	-6.462	-6.257	-6.412	-5.707	-5.977	-6.51	-6.843	-3.211	-0.194	-0.73	-0.618	0.574	0.077	-2.461	-3.638	-3.688	-3.169	-1.651	-2.199	-2.357	-2.49	-2.107	-2.119	-1.178	-2.729	-2.024	-2.55	-2.418	-1.2	-1.628	-2.735	-2.551	-2.303	-2.974	-8.856	-10.669	-11.292	-10.975	-10.233
c3_2	-5.553	-6.966	-6.742	-7.221	-7.029	-7.031	-6.122	-7.059	-7.216	-6.933	-7.086	-6.766	-6.97	-6.308	-6.521	-7.009	-7.322	-3.536	-1.036	-1.549	-1.473	-0.212	-0.671	-3.349	-4.188	-4.217	-3.854	-2.643	-3.086	-3.201	-2.839	-2.999	-3.034	-2.227	-3.507	-2.955	-3.365	-3.384	-2.227	-2.619	-3.597	-3.357	-3.14	-3.162	-9.792	-11.596	-12.258	-11.967	-11.136
c4_2	-5.385	-6.783	-6.562	-7.018	-6.83	-6.856	-5.888	-6.804	-6.987	-6.688	-6.814	-6.537	-6.724	-6.04	-6.277	-6.786	-7.108	-3.368	-0.534	-1.091	-0.99	0.327	-0.209	-2.916	-3.923	-3.962	-3.526	-2.135	-2.647	-2.786	-2.656	-2.555	-2.579	-1.668	-3.13	-2.49	-2.967	-2.915	-1.681	-2.111	-3.183	-2.964	-2.727	-3.06	-9.423	-11.242	-11.93	-11.536	-10.788
c5_2	-5.098	-6.449	-6.238	-6.64	-6.462	-6.538	-5.459	-6.315	-6.554	-6.224	-6.29	-6.111	-6.255	-5.538	-5.823	-6.367	-6.705	-3.107	0.048	-0.496	-0.377	0.815	0.304	-2.222	-3.477	-3.532	-2.975	-1.39	-1.959	-2.126	-2.377	-1.865	-1.873	-0.906	-2.513	-1.775	-2.325	-2.164	-0.932	-1.366	-2.502	-2.329	-2.074	-2.91	-8.621	-10.437	-11.042	-10.73	-10.005
v1_2	-4.287	-5.589	-5.388	-5.705	-5.538	-5.709	-4.393	-5.186	-5.524	-5.13	-5.106	-5.075	-5.156	-4.355	-4.728	-5.353	-5.729	-2.28	2.02	1.353	1.536	2.903	2.201	-0.489	-2.274	-2.364	-1.548	0.536	-0.203	-0.434	-1.471	-0.094	-0.079	1.134	-0.933	0.048	-0.685	-0.344	1.084	0.562	-0.822	-0.699	-0.386	-2.379	-7.23	-9.13	-9.68	-9.378	-8.704
v2_2	-3.604	-4.826	-4.64	-4.866	-4.716	-4.974	-3.478	-4.18	-4.598	-4.16	-4.052	-4.161	-4.18	-3.339	-3.774	-4.449	-4.85	-1.64	2.838	2.253	2.422	3.561	2.979	0.607	-1.349	-1.46	-0.52	1.575	0.869	0.636	-0.798	0.972	0.995	2.111	0.132	1.117	0.387	0.774	2.064	1.598	0.284	0.369	0.677	-1.971	-5.703	-7.597	-8.031	-7.767	-7.211
v3_2	-3.821	-5.068	-4.878	-5.131	-4.976	-5.208	-3.764	-4.493	-4.888	-4.463	-4.379	-4.447	-4.485	-3.654	-4.072	-4.733	-5.127	-1.844	2.591	1.983	2.157	3.356	2.742	0.28	-1.636	-1.741	-0.833	1.268	0.55	0.316	-1.012	0.655	0.676	1.822	-0.189	0.8	0.065	0.443	1.774	1.292	-0.047	0.048	0.359	-2.103	-6.185	-8.041	-8.505	-8.231	-7.645
v4_2	-2.463	-3.543	-3.384	-3.478	-3.354	-3.728	-2.037	-2.603	-3.104	-2.626	-2.425	-2.696	-2.638	-1.787	-2.274	-2.988	-3.407	-0.605	3.687	3.241	3.373	4.212	3.795	1.923	0.003	-0.123	0.867	2.725	2.139	1.935	0.254	2.225	2.248	3.143	1.484	2.351	1.716	2.078	3.106	2.743	1.645	1.697	1.967	-1.267	-3.65	-5.358	-5.657	-5.443	-5.027
v5_2	-4.551	-5.877	-5.671	-6.021	-5.849	-5.986	-4.748	-5.57	-5.874	-5.502	-5.51	-5.424	-5.53	-4.753	-5.097	-5.696	-6.061	-2.541	1.506	0.843	1.017	2.407	1.709	-1.017	-2.659	-2.738	-1.999	-0.02	-0.731	-0.949	-1.752	-0.624	-0.615	0.568	-1.423	-0.493	-1.189	-0.895	0.523	0.006	-1.341	-1.2	-0.898	-2.544	-7.701	-9.572	-10.144	-9.837	-9.144
v6_2	-4.185	-5.47	-5.272	-5.572	-5.409	-5.595	-4.249	-5.022	-5.375	-4.974	-4.933	-4.929	-4.998	-4.192	-4.576	-5.209	-5.589	-2.19	2.089	1.452	1.628	2.917	2.262	-0.33	-2.135	-2.229	-1.394	0.672	-0.051	-0.28	-1.378	0.056	0.072	1.246	-0.776	0.196	-0.528	-0.182	1.198	0.697	-0.658	-0.543	-0.234	-2.324	-6.918	-8.705	-9.3	-9.011	-8.374
v7_2	-4.351	-5.655	-5.454	-5.777	-5.609	-5.774	-4.475	-5.271	-5.602	-5.213	-5.195	-5.154	-5.24	-4.446	-4.812	-5.43	-5.804	-2.348	1.846	1.193	1.37	2.71	2.031	-0.629	-2.37	-2.457	-1.662	0.376	-0.347	-0.572	-1.546	-0.239	-0.226	0.96	-1.061	-0.102	-0.818	-0.491	0.913	0.401	-0.957	-0.831	-0.524	-2.424	-7.274	-9.145	-9.685	-9.388	-8.725
vvv1_2	0.331	-0.306	-0.219	-0.142	-0.08	-0.488	0.904	0.624	0.222	0.578	0.774	0.477	0.576	1.139	0.788	0.273	-0.037	1.579	3.922	3.749	3.797	4.12	3.98	3.167	2.154	2.073	2.653	3.514	3.265	3.175	2.182	3.304	3.312	3.683	2.964	3.357	3.074	3.234	3.67	3.522	3.039	3.065	3.19	0.663	0.247	-0.621	-0.708	-0.619	-0.47
v8_2	-4.061	-5.334	-5.139	-5.423	-5.262	-5.464	-4.084	-4.842	-5.21	-4.8	-4.744	-4.765	-4.824	-4.008	-4.404	-5.047	-5.432	-2.072	2.271	1.643	1.818	3.078	2.435	-0.115	-1.963	-2.061	-1.199	0.885	0.161	-0.07	-1.253	0.268	0.286	1.454	-0.571	0.411	-0.32	0.039	1.406	0.909	-0.443	-0.336	-0.025	-2.249	-6.667	-8.533	-9.029	-8.745	-8.126
v9_2	-4.335	-5.639	-5.437	-5.759	-5.592	-5.758	-4.455	-5.25	-5.582	-5.193	-5.172	-5.134	-5.219	-4.423	-4.791	-5.411	-5.785	-2.332	1.888	1.232	1.41	2.756	2.072	-0.595	-2.346	-2.434	-1.634	0.415	-0.311	-0.538	-1.528	-0.203	-0.19	1.002	-1.029	-0.065	-0.785	-0.455	0.954	0.441	-0.924	-0.799	-0.49	-2.413	-7.248	-9.121	-9.66	-9.364	-8.701
v10_2	-4.063	-5.335	-5.14	-5.424	-5.263	-5.465	-4.085	-4.843	-5.211	-4.801	-4.745	-4.767	-4.825	-4.009	-4.405	-5.048	-5.433	-2.074	2.264	1.637	1.812	3.07	2.429	-0.118	-1.965	-2.063	-1.202	0.88	0.157	-0.074	-1.255	0.264	0.282	1.448	-0.574	0.406	-0.323	0.036	1.4	0.905	-0.446	-0.339	-0.029	-2.25	-6.668	-8.532	-9.028	-8.745	-8.126
v11_2	-3.893	-5.146	-4.955	-5.216	-5.06	-5.283	-3.858	-4.594	-4.982	-4.561	-4.484	-4.54	-4.583	-3.758	-4.169	-4.825	-5.215	-1.915	2.473	1.865	2.037	3.242	2.628	0.155	-1.736	-1.839	-0.946	1.141	0.425	0.193	-1.087	0.53	0.55	1.695	-0.308	0.674	-0.056	0.315	1.647	1.165	-0.171	-0.073	0.237	-2.149	-6.317	-8.174	-8.645	-8.369	-7.776
v12_2	-3.9	-5.154	-4.962	-5.225	-5.068	-5.291	-3.867	-4.605	-4.992	-4.571	-4.496	-4.55	-4.594	-3.768	-4.179	-4.834	-5.225	-1.92	2.477	1.866	2.039	3.252	2.633	0.15	-1.743	-1.846	-0.953	1.139	0.421	0.188	-1.092	0.526	0.546	1.696	-0.315	0.67	-0.062	0.309	1.648	1.163	-0.177	-0.079	0.231	-2.152	-6.336	-8.194	-8.667	-8.391	-7.795
v13_2	-4.858	-6.215	-6.003	-6.395	-6.216	-6.311	-5.171	-6.033	-6.292	-5.946	-6	-5.841	-5.977	-5.232	-5.537	-6.104	-6.454	-2.838	0.898	0.234	0.395	1.844	1.138	-1.666	-3.115	-3.18	-2.54	-0.707	-1.379	-1.577	-2.074	-1.274	-1.275	-0.129	-2.017	-1.16	-1.803	-1.579	-0.169	-0.681	-1.978	-1.809	-1.523	-2.728	-8.368	-10.23	-10.759	-10.532	-9.789
v14_2	-4.752	-6.105	-5.894	-6.277	-6.099	-6.205	-5.034	-5.891	-6.163	-5.808	-5.851	-5.709	-5.839	-5.081	-5.398	-5.976	-6.331	-2.727	1.218	0.52	0.695	2.209	1.446	-1.42	-2.954	-3.024	-2.346	-0.419	-1.127	-1.336	-1.95	-1.018	-1.016	0.188	-1.798	-0.895	-1.572	-1.318	0.144	-0.392	-1.743	-1.581	-1.283	-2.656	-8.198	-10.073	-10.669	-10.345	-9.631
v15_2	-4.605	-5.936	-5.729	-6.087	-5.914	-6.043	-4.822	-5.651	-5.947	-5.579	-5.596	-5.497	-5.608	-4.837	-5.174	-5.768	-6.13	-2.592	1.411	0.746	0.918	2.323	1.62	-1.125	-2.737	-2.814	-2.091	-0.131	-0.839	-1.053	-1.808	-0.731	-0.724	0.458	-1.523	-0.603	-1.291	-1.008	0.413	-0.105	-1.448	-1.302	-1.002	-2.576	-7.819	-9.689	-10.269	-9.872	-9.258
v16_2	-3.871	-5.121	-4.93	-5.189	-5.033	-5.259	-3.828	-4.562	-4.952	-4.529	-4.45	-4.511	-4.551	-3.725	-4.138	-4.795	-5.187	-1.894	2.502	1.895	2.067	3.267	2.656	0.191	-1.705	-1.809	-0.912	1.176	0.461	0.229	-1.065	0.566	0.586	1.728	-0.274	0.709	-0.021	0.351	1.68	1.199	-0.134	-0.038	0.272	-2.135	-6.273	-8.128	-8.596	-8.322	-7.658
v17_2	-4.355	-5.666	-5.464	-5.791	-5.623	-5.784	-4.488	-5.292	-5.62	-5.232	-5.218	-5.17	-5.259	-4.463	-4.828	-5.447	-5.82	-2.344	1.938	1.258	1.443	2.847	2.124	-0.61	-2.37	-2.458	-1.658	0.421	-0.322	-0.552	-1.538	-0.211	-0.198	1.027	-1.049	-0.07	-0.802	-0.468	0.977	0.448	-0.944	-0.816	-0.503	-2.418	-7.332	-9.213	-9.764	-9.463	-8.755
v18_2	-2.693	-3.8	-3.636	-3.753	-3.624	-3.978	-2.318	-2.907	-3.396	-2.924	-2.737	-2.982	-2.937	-2.085	-2.566	-3.275	-3.691	-0.815	3.513	3.047	3.185	4.066	3.627	1.676	-0.258	-0.383	0.605	2.506	1.901	1.691	0.042	1.989	2.013	2.943	1.23	2.118	1.467	1.835	2.904	2.525	1.391	1.448	1.724	-1.415	-4.039	-5.774	-6.094	-5.872	-5.433
v19_2	-3.105	-4.262	-4.089	-4.252	-4.114	-4.428	-2.832	-3.468	-3.93	-3.47	-3.314	-3.506	-3.486	-2.635	-3.1	-3.798	-4.208	-1.188	3.212	2.7	2.85	3.827	3.336	1.219	-0.738	-0.858	0.118	2.106	1.459	1.239	-0.336	1.554	1.577	2.582	0.758	1.69	1.003	1.383	2.54	2.127	0.918	0.985	1.275	-1.671	-4.775	-6.562	-6.927	-6.687	-6.202
vvv2_2	1.853	1.406	1.465	1.544	1.585	1.263	2.304	2.115	1.82	2.079	2.223	2.001	2.078	2.476	2.225	1.854	1.627	2.758	4.342	4.231	4.261	4.468	4.381	3.85	3.176	3.119	3.512	4.075	3.914	3.856	3.193	3.939	3.945	4.183	3.718	3.973	3.79	3.892	4.175	4.08	3.766	3.784	3.866	1.982	1.901	1.213	1.148	1.219	1.333
Multigroup analysis of (Model 17) 2F 12 items with correlated errors
Critical Ratios for Differences between Parameters (Unconstrained)
	a1_1	a2_1	a3_1	a4_1	a5_1	a6_1	a7_1	a8_1	a9_1	a10_1	ccc1_1	c1_1	c2_1	c3_1	c4_1	v1_1	v2_1	v3_1	vvv1_1	v4_1	v5_1	v6_1	v7_1	v8_1	v9_1	v10_1	v11_1	v12_1	vvv2_1	a1_2	a2_2	a3_2	a4_2	a5_2	a6_2	a7_2	a8_2	a9_2	a10_2	ccc1_2	c1_2	c2_2	c3_2	c4_2	v1_2	v2_2	v3_2	vvv1_2	v4_2
a1_1	0
a2_1	0.668	0
a3_1	1.266	0.638	0
a4_1	1.368	0.659	-0.103	0
a5_1	1.366	0.672	-0.054	0.044	0
a6_1	-1.212	-1.804	-2.255	-2.422	-2.404	0
a7_1	-1.869	-2.468	-3.253	-3.271	-3.112	-1.625	0
a8_1	-1.299	-1.892	-2.342	-2.515	-2.646	-0.23	1.386	0
a9_1	-0.841	-1.423	-1.876	-1.997	-1.988	0.891	2.383	1.095	0
a10_1	-0.635	-1.208	-1.66	-1.755	-1.75	1.31	2.698	1.496	0.452	0
ccc1_1	-1.208	-1.589	-1.883	-1.925	-1.925	-0.549	0.1	-0.461	-0.888	-1.066	0
c1_1	-4.516	-5.157	-5.554	-6.17	-6.051	-6.715	-5.329	-6.488	-7.005	-7.017	-2.877	0
c2_1	-6.532	-7.202	-7.487	-8.362	-8.195	-11.762	-10.459	-11.443	-11.637	-11.324	-5.065	-5.816	0
c3_1	-5.238	-5.897	-6.267	-6.958	-6.801	-8.735	-7.376	-8.27	-8.855	-8.725	-3.646	-2.003	5.317	0
c4_1	-5.427	-6.092	-6.52	-7.249	-7.109	-9.412	-8.018	-9.141	-9.458	-9.268	-3.821	-2.984	4.815	-0.658	0
v1_1	-3.58	-4.197	-4.615	-5.036	-4.979	-4.415	-3.229	-4.238	-4.837	-4.976	-1.915	1.852	6.666	3.544	4.168	0
v2_1	-2.462	-3.034	-3.452	-3.696	-3.669	-2.157	-1.171	-2.018	-2.615	-2.826	-0.855	2.963	6.364	4.175	4.596	1.451	0
v3_1	-3.284	-3.876	-4.313	-4.678	-4.633	-3.752	-2.623	-3.588	-4.194	-4.361	-1.636	2.199	6.475	3.713	4.314	0.43	-1.047	0
vvv1_1	-2.207	-2.576	-2.844	-2.937	-2.927	-2.442	-1.63	-2.326	-2.828	-3.012	-3.57	1.608	4.245	2.515	2.732	0.502	-0.604	0.203	0
v4_1	-3.94	-4.561	-4.958	-5.429	-5.361	-5.409	-4.133	-5.209	-5.802	-5.897	-2.285	1.084	6.213	2.79	3.34	-0.694	-2.012	-1.084	-0.951	0
v5_1	-4.357	-4.995	-5.386	-5.932	-5.85	-6.079	-5.033	-6.103	-6.627	-6.664	-2.729	0.36	6.354	2.278	2.932	-1.489	-2.672	-1.842	-1.422	-0.748	0
v6_1	-3.769	-4.39	-4.693	-5.27	-5.218	-4.858	-3.547	-4.677	-5.26	-5.378	-2.122	2.681	5.78	3.302	3.928	-0.35	-1.744	-0.763	-0.732	0.353	1.141	0
v7_1	-4.075	-4.708	-5.114	-5.654	-5.559	-5.662	-4.307	-5.456	-6.021	-6.093	-2.419	2.34	6.55	2.975	4.313	-0.909	-2.236	-1.317	-1.066	-0.158	0.646	-0.715	0
v8_1	-5.069	-5.729	-6.124	-6.74	-6.7	-8.465	-7.093	-8.262	-8.598	-8.475	-3.451	-1.395	6.329	0.759	1.889	-3.182	-3.916	-3.399	-2.276	-2.401	-1.808	-2.773	-2.5	0
v9_1	-4.91	-5.565	-5.97	-6.594	-6.387	-7.937	-6.628	-7.532	-8.123	-8.044	-3.299	-0.971	5.344	1.837	1.917	-2.732	-3.596	-2.973	-2.09	-1.987	-1.336	-2.603	-2.029	0.485	0
v10_1	-4.253	-4.887	-5.279	-5.809	-5.686	-6.028	-4.765	-5.613	-6.365	-6.419	-2.622	0.571	6.361	4.003	3.078	-1.276	-2.502	-1.641	-1.301	-0.544	0.211	-0.93	-0.424	1.989	1.791	0
v11_1	-3.992	-4.616	-5.011	-5.492	-5.422	-5.317	-4.107	-5.129	-5.484	-5.79	-2.363	0.995	6.202	2.718	3.277	-0.79	-2.093	-1.175	-1.011	-0.091	0.657	-0.448	0.062	2.323	1.903	0.452	0
v12_1	-3.562	-4.167	-4.566	-4.973	-4.916	-4.276	-3.144	-4.107	-4.696	-4.669	-1.937	1.601	6.103	3.129	3.603	-0.079	-1.458	-0.48	-0.545	0.569	1.291	0.248	0.751	2.791	2.425	1.098	0.657	0
vvv2_1	0.453	0.107	-0.188	-0.156	-0.168	1.225	1.653	1.282	0.989	0.859	2.891	3.55	4.84	3.999	4.109	2.952	2.248	2.774	3.134	3.151	3.45	3.079	3.266	3.879	3.785	3.386	3.229	2.963	0
a1_2	-0.2	-0.762	-1.217	-1.266	-1.269	1.596	2.661	1.735	0.989	0.659	1.584	7.419	11.436	9.014	9.512	5.473	3.35	4.873	3.465	6.143	7.085	5.859	6.545	8.777	8.378	6.854	6.253	5.336	-0.651	0
a2_2	1.037	0.494	0.024	0.09	0.068	3.488	4.51	3.615	2.853	2.488	2.858	9.109	12.872	10.635	11.11	7.19	4.958	6.569	4.864	7.842	8.786	7.575	8.268	10.425	10.043	8.557	7.952	7.015	0.229	2.653	0
a3_2	1.364	0.81	0.323	0.42	0.392	4.207	5.305	4.341	3.502	3.093	3.254	10.397	14.647	12.18	12.759	8.187	5.634	7.466	5.406	8.911	10.024	8.626	9.442	11.979	11.517	9.756	9.039	7.948	0.443	3.821	0.806	0
a4_2	1.203	0.65	0.168	0.25	0.224	3.91	4.994	4.043	3.223	2.826	3.075	9.983	14.136	11.709	12.265	7.839	5.368	7.143	5.185	8.548	9.621	8.265	9.052	11.504	11.06	9.362	8.672	7.618	0.333	3.309	0.37	-0.51	0
a5_2	0.994	0.443	-0.032	0.031	0.009	3.513	4.573	3.645	2.853	2.475	2.839	9.394	13.388	11.032	11.552	7.354	5.007	6.696	4.888	8.038	9.05	7.762	8.503	10.822	10.406	8.805	8.156	7.159	0.19	2.677	-0.135	-0.927	-0.557	0
a6_2	-0.941	-1.547	-2.014	-2.165	-2.15	0.58	1.902	0.754	-0.122	-0.475	0.931	8.324	14.622	10.978	11.969	5.466	2.766	4.648	2.927	6.366	7.81	6	7.033	10.747	9.998	7.449	6.526	5.232	-1.164	-1.204	-3.224	-3.986	-3.67	-3.248	0
a7_2	-0.631	-1.239	-1.716	-1.836	-1.827	1.218	2.586	1.394	0.462	0.074	1.279	9.428	16.3	12.408	13.571	6.281	3.321	5.375	3.368	7.24	8.86	6.862	8.021	12.218	11.346	8.455	7.416	5.982	-0.954	-0.696	-2.779	-3.736	-3.463	-2.788	1.029	0
a8_2	-0.59	-1.196	-1.673	-1.787	-1.779	1.286	2.644	1.461	0.533	0.145	1.319	9.404	16.128	12.313	13.436	6.306	3.367	5.409	3.408	7.254	8.847	6.88	8.02	12.118	11.273	8.449	7.428	6.012	-0.926	-0.625	-2.702	-3.439	-3.124	-2.958	1.139	0.145	0
a9_2	-0.575	-1.176	-1.648	-1.757	-1.75	1.253	2.555	1.421	0.529	0.154	1.312	8.884	14.939	11.454	12.398	6.055	3.292	5.224	3.36	6.944	8.381	6.587	7.619	11.233	10.513	8.023	7.103	5.8	-0.916	-0.594	-2.623	-3.329	-3.025	-2.623	1.058	0.155	0.026	0
a10_2	-0.394	-0.993	-1.469	-1.558	-1.554	1.593	2.897	1.76	0.854	0.465	1.505	9.263	15.327	11.856	12.809	6.397	3.57	5.548	3.588	7.292	8.754	6.937	7.989	11.643	10.915	8.392	7.454	6.125	-0.793	-0.296	-2.339	-3.024	-2.724	-2.329	1.607	0.751	0.61	0.531	0
ccc1_2	1.304	0.977	0.689	0.748	0.732	2.255	2.676	2.312	2.013	1.875	2.349	4.32	5.533	4.743	4.848	3.757	3.078	3.585	3.279	3.984	4.226	3.877	4.055	4.634	4.544	4.166	4.015	3.761	0.748	1.487	0.693	0.513	0.608	0.731	2.017	1.826	1.799	1.787	1.674	0
c1_2	-5.33	-5.993	-6.366	-7.073	-6.96	-9.113	-7.748	-8.86	-9.19	-9.025	-3.736	-2.292	5.598	-0.273	0.429	-3.829	-4.363	-3.972	-2.621	-3.092	-2.63	-3.551	-3.314	-1.156	-1.559	-2.788	-3.026	-3.391	-4.047	-9.288	-10.9	-12.451	-12.041	-11.339	-11.555	-12.878	-12.972	-12.005	-12.415	-4.791	0
c2_2	-6.129	-6.8	-7.153	-7.961	-7.83	-11.026	-9.702	-10.761	-10.94	-10.655	-4.601	-4.984	2.086	-3.809	-3.761	-5.856	-5.762	-5.78	-3.684	-5.219	-5.198	-5.682	-5.771	-5.022	-4.98	-5.247	-5.191	-5.225	-4.569	-10.803	-12.297	-14.022	-13.537	-12.696	-13.885	-15.656	-15.403	-14.226	-14.626	-5.281	-3.765	0
c3_2	-4.962	-5.611	-5.989	-6.621	-6.521	-7.775	-6.48	-7.55	-7.989	-7.939	-3.363	-1.179	5.11	0.694	1.295	-2.84	-3.687	-3.089	-2.183	-2.123	-1.52	-2.534	-2.163	0.077	-0.341	-1.702	-2.045	-2.54	-3.835	-8.286	-9.93	-11.315	-10.889	-10.107	-9.616	-10.82	-10.54	-10.138	-10.522	-4.593	0.967	3.976	0
c4_2	-5.158	-5.818	-6.195	-6.874	-6.766	-8.611	-7.254	-8.365	-8.737	-8.611	-3.554	-1.727	5.881	0.363	1.108	-3.377	-4.055	-3.57	-2.401	-2.631	-2.082	-3.079	-2.772	-0.42	-0.879	-2.259	-2.557	-2.992	-3.94	-8.905	-10.539	-12.12	-11.574	-10.966	-10.878	-12.171	-12.235	-11.358	-11.765	-4.69	0.751	4.059	-0.4	0
v1_2	-4.071	-4.705	-5.102	-5.613	-5.535	-5.683	-4.408	-5.479	-6.041	-6.111	-2.419	1.068	6.993	3.077	3.752	-0.881	-2.209	-1.281	-1.057	-0.133	0.69	-0.519	0.03	2.611	2.115	0.462	-0.035	-0.736	-3.259	-6.624	-8.375	-9.599	-9.192	-8.627	-7.077	-8.081	-8.08	-7.666	-8.039	-4.043	3.415	5.901	2.216	2.867	0
v2_2	-3.18	-3.779	-4.185	-4.547	-4.495	-3.545	-2.424	-3.379	-3.993	-4.168	-1.534	2.329	6.705	3.882	4.348	0.597	-0.891	0.165	-0.085	1.253	2.014	0.934	1.468	3.539	3.172	1.814	1.345	0.643	-2.704	-4.637	-6.382	-7.26	-6.939	-6.502	-4.408	-5.118	-5.155	-4.984	-5.304	-3.521	4.115	5.873	3.228	3.727	1.454	0
v3_2	-3.539	-4.151	-4.553	-4.97	-4.909	-4.32	-3.148	-4.142	-4.744	-4.888	-1.892	1.838	6.638	3.517	4.035	0.037	-1.403	-0.387	-0.476	0.722	1.504	0.383	0.924	3.139	2.739	1.296	0.816	0.113	-2.933	-5.386	-7.013	-8.079	-7.731	-7.259	-5.338	-6.133	-6.162	-5.922	-6.26	-3.739	3.773	5.711	2.799	3.351	0.905	-0.555	0
vvv1_2	0.104	-0.276	-0.596	-0.578	-0.589	1.065	1.574	1.134	0.78	0.62	1.289	3.57	5.06	4.089	4.22	2.884	2.08	2.679	2.344	3.16	3.455	3.029	3.245	3.956	3.845	3.381	3.198	2.891	-0.323	0.247	-0.61	-0.817	-0.712	-0.576	0.85	0.611	0.579	0.569	0.429	-3.661	4.15	4.75	3.903	4.025	3.227	2.601	2.863	0
v4_2	-3.838	-4.461	-4.86	-5.327	-5.257	-5.036	-3.814	-4.845	-5.429	-5.538	-2.189	1.404	6.693	3.226	3.807	-0.464	-1.847	-0.876	-0.805	0.25	1.05	-0.111	0.433	2.807	2.367	0.833	0.346	-0.355	-3.119	-6.014	-7.733	-8.813	-8.445	-7.931	-6.328	-7.257	-7.265	-6.928	-7.291	-3.908	3.472	5.756	2.438	3.004	0.409	-1.046	-0.494	-3.077	0
v5_2	-3.687	-4.305	-4.706	-5.148	-5.082	-4.67	-3.472	-4.486	-5.08	-5.207	-2.039	1.634	6.674	3.385	3.934	-0.204	-1.62	-0.624	-0.637	0.497	1.29	0.146	0.691	2.987	2.567	1.076	0.592	-0.112	-3.025	-5.696	-7.412	-8.44	-8.084	-7.589	-5.684	-6.62	-6.637	-6.359	-6.705	-3.828	3.619	5.774	2.63	3.175	0.669	-0.793	-0.238	-2.97	0.258
v6_2	-4.983	-5.641	-6.022	-6.678	-6.574	-8.181	-6.82	-7.938	-8.343	-8.244	-3.366	-1.179	6.445	1.02	1.837	-2.945	-3.751	-3.181	-2.172	-2.183	-1.554	-2.628	-2.26	0.295	-0.221	-1.75	-2.102	-2.601	-3.827	-8.563	-10.222	-11.58	-11.272	-10.617	-10.344	-11.621	-11.667	-10.847	-11.253	-4.587	2.236	4.618	0.158	0.669	-2.322	-3.323	-2.892	-3.898	-2.545
v7_2	-4.503	-5.151	-5.542	-6.126	-6.035	-6.884	-5.548	-6.659	-7.155	-7.146	-2.861	0.161	7.099	2.388	3.198	-1.795	-2.923	-2.137	-1.567	-1.02	-0.235	-1.441	-0.94	1.819	1.262	-0.463	-0.925	-1.565	-3.524	-7.539	-9.248	-10.596	-10.17	-9.577	-8.656	-9.706	-9.826	-9.217	-9.611	-4.301	4.216	5.657	1.43	3.384	-0.991	-2.31	-1.804	-3.547	-1.34
v8_2	-4.63	-5.279	-5.666	-6.266	-6.172	-7.165	-5.834	-6.939	-7.417	-7.392	-2.997	-0.198	6.69	1.968	2.741	-2.087	-3.136	-2.403	-1.733	-1.322	-0.583	-1.744	-1.278	1.377	0.846	-0.8	-1.232	-1.834	-3.608	-7.769	-9.463	-10.852	-10.289	-9.792	-8.987	-10.132	-10.176	-9.536	-9.93	-4.38	2.294	5.388	1.055	2.862	-1.329	-2.564	-2.077	-3.643	-1.651
v9_2	-4.079	-4.709	-5.104	-5.607	-5.531	-5.608	-4.362	-5.409	-5.971	-6.049	-2.437	0.943	6.511	2.823	3.432	-0.926	-2.226	-1.315	-1.089	-0.201	0.583	-0.576	-0.049	2.371	1.918	0.367	-0.107	-0.784	-3.272	-6.501	-8.215	-9.36	-8.981	-8.28	-6.931	-7.896	-7.768	-7.514	-7.877	-4.063	3.106	5.291	3.616	2.55	-0.079	-1.478	-0.941	-3.255	-0.467
v10_2	-4.346	-4.985	-5.378	-5.927	-5.843	-6.341	-5.05	-6.129	-6.656	-6.688	-2.707	0.441	6.604	2.466	3.151	-1.459	-2.657	-1.82	-1.396	-0.711	0.066	-1.108	-0.599	1.957	1.463	-0.154	-0.617	-1.269	-3.435	-7.109	-8.817	-10.075	-9.667	-9.001	-7.886	-8.976	-8.77	-8.458	-8.837	-4.217	2.751	5.572	3.061	2.193	-0.637	-1.984	-1.464	-3.443	-1.007
v11_2	-3.537	-4.148	-4.55	-4.965	-4.904	-4.305	-3.138	-4.128	-4.729	-4.873	-1.892	1.82	6.576	3.483	3.993	0.032	-1.402	-0.389	-0.479	0.714	1.49	0.376	0.913	3.107	2.711	1.283	0.807	0.108	-2.933	-5.371	-7.078	-8.049	-7.707	-7.234	-5.314	-6.11	-6.133	-5.805	-6.232	-3.74	3.695	5.723	2.766	3.28	0.893	-0.556	-0.005	-2.863	0.488
v12_2	-3.644	-4.259	-4.66	-5.092	-5.028	-4.548	-3.366	-4.367	-4.962	-5.096	-1.999	1.66	6.552	3.361	3.887	-0.147	-1.561	-0.564	-0.598	0.543	1.323	0.199	0.736	2.972	2.567	1.114	0.637	-0.059	-3.001	-5.587	-7.296	-8.299	-7.95	-7.465	-5.609	-6.435	-6.454	-6.193	-6.428	-3.804	3.574	5.679	2.624	3.149	0.715	-0.731	-0.181	-2.941	0.31
vvv2_2	2.237	1.993	1.775	1.832	1.819	2.937	3.232	2.976	2.767	2.669	3.016	4.374	5.207	4.661	4.731	3.989	3.525	3.873	3.686	4.147	4.309	4.071	4.191	4.584	4.524	4.268	4.168	3.996	1.747	2.462	1.864	1.732	1.804	1.896	2.69	2.552	2.534	2.525	2.444	2.984	4.694	5.028	4.562	4.625	4.188	3.829	3.978	3.247	4.085
[truncated: 39 more columns]

## Sheet: Item 15 deleted
1F with item 15 deleted N = 123
CMIN
Model	NPAR	CMIN	DF	P	CMIN/DF
Default model	40	465.954	150	0	3.106
Saturated model	190	0	0
Independence model	19	4086.92	171	0	23.9
Baseline Comparisons
Model	NFI	RFI	IFI	TLI	CFI
	Delta1	rho1	Delta2	rho2
Default model	0.886	0.87	0.92	0.908	0.919
Saturated model	1		1		1
Independence model	0	0	0	0	0
RMSEA
Model	RMSEA	LO 90	HI 90	PCLOSE
Default model	0.131	0.118	0.145	0
Independence model	0.433	0.422	0.445	0
1F with item 15 deleted N = 59
CMIN
Model	NPAR	CMIN	DF	P	CMIN/DF
Default model	40	361.177	150	0	2.408
Saturated model	190	0	0
Independence model	19	1660.55	171	0	9.711
Baseline Comparisons
Model	NFI	RFI	IFI	TLI	CFI
	Delta1	rho1	Delta2	rho2
Default model	0.782	0.752	0.86	0.838	0.858
Saturated model	1		1		1
Independence model	0	0	0	0	0
RMSEA
Model	RMSEA	LO 90	HI 90	PCLOSE
Default model	0.156	0.135	0.176	0
Independence model	0.388	0.371	0.405	0
1F with item 15 deleted N = 64
CMIN
Model	NPAR	CMIN	DF	P	CMIN/DF
Default model	40	326.648	150	0	2.178
Saturated model	190	0	0
Independence model	19	2505.16	171	0	14.65
Baseline Comparisons
Model	NFI	RFI	IFI	TLI	CFI
	Delta1	rho1	Delta2	rho2
Default model	0.87	0.851	0.925	0.914	0.924
Saturated model	1		1		1
Independence model	0	0	0	0	0
RMSEA
Model	RMSEA	LO 90	HI 90	PCLOSE
Default model	0.137	0.117	0.157	0
Independence model	0.465	0.449	0.482	0

## Sheet: Second order factor
#NAME?
CMIN
Model	NPAR	CMIN	DF	P	CMIN/DF
Default model	41	634.629	169	0	3.755
Saturated model	210	0	0
Independence model	20	4446.27	190	0	23.401
Baseline Comparisons
Model	NFI	RFI	IFI	TLI	CFI
	Delta1	rho1	Delta2	rho2
Default model	0.857	0.84	0.891	0.877	0.891
Saturated model	1		1		1
Independence model	0	0	0	0	0
RMSEA
Model	RMSEA	LO 90	HI 90	PCLOSE
Default model	0.15	0.138	0.163	0
Independence model	0.429	0.418	0.439	0
2F 20 items (Model 5) with second order factor N = 59
CMIN
Model	NPAR	CMIN	DF	P	CMIN/DF
Default model	46	370.324	164	0	2.258
Saturated model	210	0	0
Independence model	20	1794.95	190	0	9.447
Baseline Comparisons
Model	NFI	RFI	IFI	TLI	CFI
	Delta1	rho1	Delta2	rho2
Default model	0.794	0.761	0.873	0.851	0.871
Saturated model	1		1		1
Independence model	0	0	0	0	0
RMSEA
Model	RMSEA	LO 90	HI 90	PCLOSE
Default model	0.147	0.127	0.167	0
Independence model	0.382	0.366	0.398	0
2F 20 items (Model 5) with second order factor N = 64
CMIN
Model	NPAR	CMIN	DF	P	CMIN/DF
Default model	46	342.935	164	0	2.091
Saturated model	210	0	0
Independence model	20	2742.89	190	0	14.436
Baseline Comparisons
Model	NFI	RFI	IFI	TLI	CFI
	Delta1	rho1	Delta2	rho2
Default model	0.875	0.855	0.931	0.919	0.93
Saturated model	1		1		1
Independence model	0	0	0	0	0
RMSEA
Model	RMSEA	LO 90	HI 90	PCLOSE
Default model	0.132	0.112	0.151	0
Independence model	0.462	0.447	0.477	0
2F 19 items (Model 8) with second order factor N = 123
CMIN
Model	NPAR	CMIN	DF	P	CMIN/DF
Default model	39	545.697	151	0	3.614
Saturated model	190	0	0
Independence model	19	4167.53	171	0	24.372
Baseline Comparisons
Model	NFI	RFI	IFI	TLI	CFI
	Delta1	rho1	Delta2	rho2
Default model	0.869	0.852	0.902	0.888	0.901
Saturated model	1		1		1
Independence model	0	0	0	0	0
RMSEA
Model	RMSEA	LO 90	HI 90	PCLOSE
Default model	0.146	0.133	0.16	0
Independence model	0.438	0.426	0.449	0

## Sheet: Bifactor structure
2F (Model 6+A24) with bifactor structure N = 123
CMIN
Model	NPAR	CMIN	DF	P	CMIN/DF
Default model	42	574.965	168	0	3.422
Saturated model	210	0	0
Independence model	20	4446.27	190	0	23.401
Baseline Comparisons
Model	NFI	RFI	IFI	TLI	CFI
	Delta1	rho1	Delta2	rho2
Default model	0.871	0.854	0.905	0.892	0.904
Saturated model	1		1		1
Independence model	0	0	0	0	0
RMSEA
Model	RMSEA	LO 90	HI 90	PCLOSE
Default model	0.141	0.128	0.154	0
Independence model	0.429	0.418	0.439	0
2F with bifactor structure N = 59
CMIN
Model	NPAR	CMIN	DF	P	CMIN/DF
Default model	42	396.324	168	0	2.359
Saturated model	210	0	0
Independence model	20	1794.95	190	0	9.447
Baseline Comparisons
Model	NFI	RFI	IFI	TLI	CFI
	Delta1	rho1	Delta2	rho2
Default model	0.779	0.75	0.86	0.839	0.858
Saturated model	1		1		1
Independence model	0	0	0	0	0
RMSEA
Model	RMSEA	LO 90	HI 90	PCLOSE
Default model	0.153	0.134	0.173	0
Independence model	0.382	0.366	0.398	0
2F with bifactor structure N = 64
CMIN
Model	NPAR	CMIN	DF	P	CMIN/DF
Default model	42	375.304	168	0	2.234
Saturated model	210	0	0
Independence model	20	2742.89	190	0	14.436
Baseline Comparisons
Model	NFI	RFI	IFI	TLI	CFI
	Delta1	rho1	Delta2	rho2
Default model	0.863	0.845	0.919	0.908	0.919
Saturated model	1		1		1
Independence model	0	0	0	0	0
RMSEA
Model	RMSEA	LO 90	HI 90	PCLOSE
Default model	0.14	0.121	0.159	0
Independence model	0.462	0.447	0.477	0

## Sheet: Invariance six-item Internet Ad
Critical Ratios for Differences between Parameters (Unconstrained)
	a1_1	a2_1	a3_1	a4_1	a5_1	c1_1	c2_1	v1_1	vvv1_1	v2_1	v3_1	v4_1	v5_1	v6_1	a1_2	a2_2	a3_2	a4_2	a5_2	c1_2	c2_2	v1_2	vvv1_2	v2_2	v3_2	v4_2	v5_2	v6_2
a1_1	0
a2_1	-0.104	0
a3_1	0.73	1.094	0
a4_1	0.702	1.055	-0.039	0
a5_1	1.603	1.511	0.9	0.91	0
c1_1	-4.581	-5.101	-5.773	-5.847	-5.183	0
c2_1	-7.256	-8.318	-9.009	-9.506	-7.606	-2.684	0
v1_1	-3.284	-3.568	-4.216	-4.331	-4.043	1.829	5.052	0
vvv1_1	-0.443	-0.414	-0.691	-0.692	-0.958	2.554	3.691	1.523	0
v2_1	-2.699	-2.944	-3.555	-3.59	-3.477	3.334	4.989	0.405	-1.331	0
v3_1	-4.814	-5.268	-6.122	-6.228	-5.407	0.4	4.28	-1.758	-2.476	-2.187	0
v4_1	-6.309	-7.188	-7.764	-8.265	-6.742	-1.453	2.773	-3.747	-3.258	-3.97	-2.672	0
v5_1	-6.083	-6.89	-7.754	-7.69	-6.53	-1.285	2.451	-3.402	-3.206	-3.849	-2.479	0.338	0
v6_1	-2.127	-2.257	-2.822	-2.839	-2.855	3.769	4.968	0.903	-0.977	0.584	2.549	4.076	3.983	0
a1_2	-0.788	-0.796	-1.482	-1.499	-1.786	6.116	12.111	3.614	0.094	2.988	7.242	11.021	10.733	2.043	0
a2_2	-0.069	0.019	-0.689	-0.687	-1.163	7.636	15.609	4.842	0.568	4.119	9.518	14.684	14.323	2.983	1.898	0
a3_2	0.005	0.101	-0.591	-0.586	-1.081	7.434	14.395	4.774	0.61	4.084	9.016	13.406	13.091	2.993	2.14	0.296	0
a4_2	-0.362	-0.315	-1.009	-1.014	-1.411	6.901	13.643	4.278	0.374	3.609	8.341	12.612	12.299	2.572	0.997	-0.87	-1.137	0
a5_2	-0.108	-0.03	-0.693	-0.691	-1.154	6.77	12.315	4.344	0.527	3.719	7.878	11.288	11.03	2.736	1.625	-0.106	-0.287	0.532	0
c1_2	-5.283	-5.84	-6.53	-6.658	-5.832	-0.583	2.338	-2.52	-2.86	-2.877	-1.167	0.89	0.661	-3.161	-7.328	-9.21	-8.964	-8.299	-7.927	0
c2_2	-7.526	-8.56	-9.351	-9.594	-7.819	-3.522	-1.308	-5.511	-4.063	-5.746	-5.62	-4.067	-4.412	-5.625	-13.94	-18.464	-16.22	-15.804	-13.955	-3.108	0
v1_2	-4.381	-4.834	-5.526	-5.633	-5.017	0.755	4.255	-1.297	-2.257	-1.706	0.479	2.854	2.613	-2.116	-6.276	-8.29	-7.895	-7.271	-7	1.44	5.161	0
vvv1_2	2.991	3.043	2.867	2.876	2.618	4.54	5.081	4.075	3.086	3.958	4.497	4.853	4.818	3.775	3.21	2.996	2.939	3.081	2.997	4.686	5.198	4.371	0
v2_2	-3.301	-3.585	-4.234	-4.302	-4.029	1.921	5.238	-0.047	-1.618	-0.476	1.886	4.058	3.852	-0.993	-3.925	-5.332	-5.262	-4.692	-4.698	3.592	5.902	1.32	-4.105	0
v3_2	-5.819	-6.593	-7.372	-7.559	-6.303	-0.816	3.463	-3.06	-3.003	-3.426	-1.776	1.27	0.883	-3.621	-9.762	-12.746	-12.205	-11.173	-10.153	-0.131	4.391	-1.912	-4.742	-3.421	0
v4_2	-6.284	-7.137	-7.923	-8.128	-6.715	-1.528	2.31	-3.721	-3.282	-4.053	-2.82	-0.101	-0.492	-4.16	-11.066	-14.791	-12.881	-12.662	-11.335	-0.9	4.002	-2.981	-4.863	-3.964	-1.153	0
v5_2	-4.358	-4.832	-5.542	-5.657	-4.999	0.948	4.854	-1.195	-2.205	-1.62	0.717	3.37	3.103	-2.046	-6.118	-8.038	-7.798	-7.008	-6.813	1.766	5.633	0.177	-4.381	-1.259	2.563	3.215	0
v6_2	-2.305	-2.441	-3.024	-3.059	-3.084	2.625	5.354	0.874	-1.041	0.468	2.644	4.393	4.23	-0.078	-2.273	-3.3	-3.318	-2.85	-2.977	4.3	5.869	2.127	-3.82	1.026	3.899	4.311	2.119	0
